# 1 Bacterial glycogen provides short-term benefits in changing 2 environments

3 Karthik Sekar<sup>1,†</sup>, Stephanie M. Linker<sup>1,2,†</sup>, Jen Nguyen<sup>3,4</sup>, Alix Grünhagen<sup>1</sup>, Roman Stocker<sup>3</sup>,  
4 Uwe Sauer<sup>1,\*</sup>

5 <sup>1</sup>Institute of Molecular Systems Biology, Department of Biology, ETH Zurich, 8049 Zurich,  
6 Switzerland.

7 <sup>2</sup>Laboratory of Physical Chemistry, Department of Chemistry, ETH Zurich, 8049 Zurich,  
8 Switzerland.

9 <sup>3</sup>Institute of Environmental Engineering, Department of Civil, Environmental and Geomatic  
10 Engineering, ETH Zurich, 8049 Zurich, Switzerland.

11 <sup>4</sup>Microbiology Graduate Program, Massachusetts Institute of Technology, Cambridge 02139,  
12 Massachusetts, USA.

13 <sup>†</sup>denotes equal contribution

14 \*To whom correspondence should be addressed: [sauer@imsb.biol.ethz.ch](mailto:sauer@imsb.biol.ethz.ch)

15

## 16 Abstract

17 Changing nutritional conditions challenge microbes and shape their evolutionary  
18 optimization. Here we investigated the role of glycogen in dynamic physiological adaptation  
19 of *Escherichia coli* to fluctuating nutrients following carbon starvation using real-time  
20 metabolomics. We found significant metabolic activity remaining after the depletion of  
21 environmental glucose that was linked to a rapid utilization of intracellular glycogen.  
22 Glycogen was depleted by 80% within minutes of glucose starvation and similarly  
23 replenished within minutes of glucose availability. These fast timescales of glycogen  
24 utilization correspond to the short-term benefits that glycogen provided to cells undergoing  
25 various physiological transitions. Cells capable of utilizing glycogen exhibited shorter lag  
26 times than glycogen mutants when starved between different carbon sources. The ability to

27 utilize glycogen was also important for the transition between planktonic and biofilm  
28 lifestyles and enabled increased glucose uptake during pulses of limited glucose availability.  
29 While wild-type and mutant strains exhibited comparable growth rates in steady  
30 environments, mutants deficient in glycogen utilization grew more poorly in environments  
31 that fluctuated on minute-scales between carbon availability and starvation. Altogether, these  
32 results highlight an underappreciated role of glycogen to rapidly provide carbon and energy in  
33 changing environments, thereby increasing survival and competition capabilities in  
34 fluctuating and nutrient poor conditions.

35

## 36 Introduction

37 Microbes must adapt to and compete under changing nutrient conditions. Instead of a well-  
38 mixed environment, bacteria in the wild often experience a feast-or-famine existence. Many  
39 microbial habitats are characterized by longer periods of nutrient starvation, intermittently  
40 punctuated by nutrient availability (Stocker, 2012). Thus, microorganisms face strong  
41 selective pressure to quickly resume growth when nutrients once again become available, and  
42 a diversity of strategies has evolved (Bergkessel, Basta, & Newman, 2016; Shoemaker &  
43 Lennon, 2018). Generally, these strategies involve the accumulation of unused resource that  
44 are labile and quickly activated when richer nutrient environments permit fast growth. For  
45 example, *Escherichia coli* facilitate rapid physiological transitions to higher quality nutrient  
46 conditions by maintaining a pool of ribosomes that only become translationally active as  
47 available nutrient becomes more abundant (Kohanim et al., 2018; Li et al., 2018; MetzI-Raz et  
48 al., 2017; Mori, Schink, Erickson, Gerland, & Hwa, 2017). *E. coli* also often feature  
49 additional enzymatic capacity beyond that immediately required (Davidi & Milo, 2017;  
50 O'Brien, Utrilla, & Palsson, 2016; Sander et al., 2019), and accumulate metabolically costly  
51 amino acids from protein degradation during starvation, which are then rapidly used for RNA

52 and protein synthesis upon the resumption of growth (Link, Fuhrer, Gerosa, Zamboni, &  
53 Sauer, 2015). Strategies in other organisms include accumulation of alanine dehydrogenase in  
54 *Bacillus subtilis* to expedite growth after shifts to different environments (Mutlu et al., 2018),  
55 and the accumulation of methane oxidases in the methanotroph, *Methyloprofundus sedimenti*,  
56 induced by starvation in an effort to rapidly convert the next available methane into methanol  
57 (Tavormina et al., 2017).

58

59 Glycogen, a polymer of glucose, is another stored resource across evolutionarily divergent  
60 species. While the role of glycogen in mammalian cells is well-established as a temporary  
61 sugar reserve, the role of glycogen in bacteria such as *E. coli* has been less clear. Earlier  
62 studies have linked glycogen with long-term survival, contributing an energy source when the  
63 environment does not (Wilson et al., 2010); whereas, others discuss it as a temporary resource  
64 used during the physiological transitions necessitated by dynamic environmental conditions  
65 (Morin et al., 2017; Seok et al., 1997; Yamamotoya et al., 2012). Some studies combine the  
66 two perspectives, describing a role for glycogen that contributes to survival or maintenance in  
67 environments that frequently fluctuate in nutrient availability (Bourassa & Camilli, 2009;  
68 Jones et al., 2008). The concept of glycogen as a nutrient “bank” from which cells withdraw  
69 and deposit (Bertrand, 2019) summarizes the prevailing view about the role of glycogen in  
70 bacteria; however, for how long after starvation glycogen continues to supply the cell and  
71 towards what physiological processes it is used remains to be clarified.

72

73 Here, we describe the temporal dynamics of glycogen synthesis and breakdown between  
74 periods of nutrient availability and starvation. Using real-time metabolomics (Link et al.,  
75 2015) and glycogen measurements, we discovered that glycogen is depleted by more than  
76 80% within 10 minutes of entry into starvation conditions and replenished after 2 min of

77 nutrient availability. By comparing wild-type cells with cells unable to use glycogen, we  
78 found that glycogen shortens lag times when switching between carbon sources, enhances  
79 uptake when glucose is limited and facilitates the transition from planktonic to biofilm  
80 lifestyles. Importantly, this advantage conferred by glycogen existed only in dynamic or  
81 fluctuating environments; glycogen-deficient cells performed comparably to glycogen wild-  
82 type cells in steady environments. Our results suggest a role for glycogen during  
83 physiological transitions that involve starvation. We propose that glycogen serves as a short-  
84 term resource, consumed in the minutes after the onset of starvation. The short-term uses of  
85 glycogen may lead to long-term benefits; though from our data, it is unlikely that glycogen  
86 stores alone work to directly support bacterial maintenance in extended periods of nutrient  
87 starvation.

88

## 89 Results

### 90 Cells utilize glycogen upon carbon starvation

91 To investigate the role of glycogen during starvation, we designed a real-time metabolomics  
92 experiment to compare the metabolic changes across a transition into starvation of *E. coli*  
93 wild-type and a mutant unable to utilize glycogen. Specifically, we harvested minimal  
94 medium mid-log phase cultures at an optical density of 600 nm (OD) of 0.8 by fast filtration  
95 (Rabinowitz & Kimball, 2007) and resuspended them in the same medium but with a limiting  
96 amount of glucose as the sole carbon source (Fig 1A). We designed the medium such that the  
97 culture would deplete all carbon within 30-40 min (Supplementary Information). Across the  
98 transition into starvation, we measured over 100 metabolites as the sum of extra- and  
99 intracellular molecules every 15 s using real-time metabolomics (Link et al., 2015). In wild-  
100 type cells, the ion corresponding to hexoses such as glucose was depleted within 30-40 min  
101 (Fig 1B). Several ions annotated to central carbon metabolites diminished immediately after

102 glucose was depleted (Figure S1), but others such as hexose phosphate and amino acids  
103 remained stable or even increased such as the tricarboxylic acid (TCA) cycle intermediate  
104 (iso)citrate (Fig 1B). The large number of stable or even increased metabolites suggest  
105 ongoing metabolism that is supplied from another source. Given the stable concentration of  
106 hexose phosphates and that the first step of glycogen hydrolysis releases glucose-1-phosphate,  
107 we hypothesized that glycogen usage may supply metabolism. Indeed, by performing the  
108 same experiment with the *glgP* mutant that is unable to use glycogen, we observed a similar  
109 depletion of glucose across the shift into starvation. In contrast to the wild-type, however, the  
110 level of hexose phosphates in the *glgP* mutant depleted concurrently with glucose (Fig 1B).  
111 Additionally, other metabolite levels were reduced compared to the wild-type (Fig 1B).  
112 Glycogen utilization did not explain stable levels of all ions during transition to starvation  
113 (Figure S1B); specifically, the abundances of ions corresponding to metabolites 3-  
114 propylmalate, isopropylmaleate, and orotate remained roughly constant in both strains.  
115 Nonetheless, the depletion of hexose phosphates in the wild-type versus *glgP* strain implicates  
116 the utilization of glycogen within minutes of the transition into starvation.

117

118 To test the hypothesis that a rapid onset of glycogen breakdown serves as an immediate fuel,  
119 we measured cellular glycogen content from the onset of starvation to 50 min after starvation  
120 (Figure 2A). We found that glycogen content diminished by 80% within the first 10 min of  
121 starvation. Thus, *E. coli* consumes glycogen rapidly after carbon depletion, potentially  
122 enabling the pronounced metabolic activity we observed even hours after starvation entry  
123 (Figure 1). To elucidate how rapidly the glycogen storage is replenished upon the return of  
124 carbon availability, we added fructose to a culture that was carbon starved for 30 min.  
125 Fructose was chosen because glucose supplementation would have interfered with the ability  
126 to accurately measure glycogen content. Upon fructose addition, the intracellular glycogen

127 content reached a steady glycogen level within 2 min (Figure 2B). Thus, glycogen synthesis  
128 and degradation occur on minute time scales, suggesting that glycogen serves a potential role  
129 as a short-term energy storage in microbes, akin to the mammalian system.

130

131 To elucidate the complete dynamics of the metabolic response to glycogen degradation and  
132 synthesis, we designed a more controlled real-time metabolomics experiment. Specifically,  
133 we fed glucose to a culture that was starved for 30 min at a constant rate of 8 mmol glucose/g  
134 dry weight/h for 5 min, then we turned off the feed pump, and we measured metabolism for  
135 an additional 80 min. The feedrate of 8 mmol/g/h was chosen to be well below the maximum  
136 uptake rate of *E. coli* (Monk et al., 2016; Sekar et al., 2018), meaning that glucose will not  
137 abundantly accumulate in the medium. Consistent with this design, the ion corresponding to  
138 glucose depleted within 1-2 min after the feed ceased (Figure S2). We observed a sudden drop  
139 after glucose depletion in all other metabolite concentrations including hexose-6-phosphate,  
140 (iso)citrate, and other central carbon metabolites for both wild-type and *glgP* (Figure 3). In  
141 contrast to the *glpP* mutant, several metabolites within or near the TCA cycle exhibited a  
142 secondary response in the wild-type. After initial depletion, isocitrate, in particular,  
143 immediately arises again within 5 min to a level near that of the glucose fed state. This  
144 “bounce” effect was also observed prominently in glutamine, glutamate, malate, and  
145 aspartate, as indicated by the green arrows. That the bounce effect was observed primarily in  
146 metabolites within or near the TCA cycle (Figure 3, Figure S3) suggests that glycogen is used  
147 to fuel respiration right after the onset of starvation.

148

149 Overall, we posit that glucose starvation initiates glycogen utilization, both during gradual  
150 glucose depletion as in the earlier experiment or the nearly instantaneous depletion here.  
151 These observations are consistent with known and suggested interactions of glycogen

152 phosphorylase and glucose uptake-related proteins (Seok et al., 1997; Tian, Fauré, Mori, &  
153 Matsuno, 2013); specifically, the HPr protein involved in glucose uptake positively activates  
154 glycogen phosphorylation allosterically. A strongly stimulatory effect occurs when HPr is  
155 dephosphorylated as is typical for starvation. The rapid timescale enabled by allosteric  
156 regulation is consistent with our data, which suggests that decreasing glucose uptake rapidly  
157 triggers glycogen usage.

158

### 159 [Glycogen grants advantage in changing conditions](#)

160 The minute-scale liquidation of glycogen led us to ask whether glycogen enables cells to  
161 accommodate sudden environmental change. To evaluate how glycogen affects the ability to  
162 adapt to new environments, we tested two biologically relevant transitions: a change of  
163 nutrient source and the transition from planktonic to biofilm growth. As a control, we first  
164 tested the influence of glycogen in stable environments and determined that the difference in  
165 the steady-state growth rate of wild-type cells versus different glycogen mutants was small  
166 (within 15%; [Figure 4A](#)). Next, we performed a nutrient-shift experiment where wild-type  
167 and *glgP* mutant were grown to mid-log phase (OD 0.4) in glucose medium. After  
168 centrifugation and washing, cultures were rapidly transferred into a medium with acetate as  
169 the sole carbon source, either directly or with a transitory 30 min period of starvation in  
170 carbon-free medium. Without starvation, the time to resume full growth after the switch (i.e.  
171 the lag time) was identical for wild-type and mutant ([Figure 4B](#)). With an intermittent  
172 starvation period, however, the glycogen mutant exhibited a roughly doubled lag time (~220  
173 min versus ~110 min) with respect to the wild-type. To test whether this reliance on glycogen  
174 was also required during less abrupt transitions, we performed a modified lag time  
175 experiment, where acetate was added either 60 min before or 60 min after glucose was  
176 depleted from the initial medium ([Figure 4C](#)). Consistent with the previous experiment, we

177 found comparable lag times between the glycogen mutant and wild type without starvation.  
178 However, after a period of starvation, the lag time of the glycogen mutant was again  
179 significantly prolonged with respect to the wild-type. Presumably, the wild-type has a shorter  
180 lag time after starvation because they either initiate the adaptation already before depletion of  
181 the primary carbon source or scavenge previously excreted carbon sources such as acetate  
182 (Mandel & Silhavy, 2005; Rahman, Hasan, Oba, & Shimizu, 2006; Wei, Shin, LaPorte,  
183 Wolfe, & Romeo, 2000). Our data suggests that cells unable to use glycogen are consequently  
184 slower in completing the necessary molecular adaptations for full growth in new conditions.  
185 Likely, these cells are deprived of alternative carbon and/or energy sources when  
186 experiencing a change in carbon source.

187

188 The transition from planktonic to sessile (biofilm) lifestyles represent another adaptation that  
189 requires substantial restructuring of cellular physiology. Biofilm formation is characterized by  
190 three phases: attachment, maturation, and dispersal (Weiss, Obied, Kalkman, Lammertink, &  
191 van Leeuwen, 2016). We focused on the attachment phase, which is characterized by the  
192 decrease of planktonic cells. A common method for estimating the concentration of  
193 planktonic bacteria relies on measuring the OD<sub>600</sub>. When stationary phase *E. coli* was cultured  
194 without shaking, the number of planktonic cells decreased by 89% within 18 hours (Figure  
195 4D). The *glgP* and *glgA* mutants, in contrast, remained largely planktonic even after 18 hours  
196 (26% and 36% decrease, respectively). Therefore, wild-type cells have either an increased  
197 attachment rate or an increased mortality rate in comparison to the glycogen mutant. The  
198 latter is unlikely as our previous experiments have indicated metabolic, viable activity for  
199 cells well into starvation. Biofilm formation is induced by nutrient starvation and inhibited by  
200 glucose addition (Thomason, Fontaine, De Lay, & Storz, 2012; Zhao et al., 2017). We



201 therefore reason that glycogen facilitates the attachment phase of biofilm formation under  
202 starvation conditions, here by providing resources for matrix protein or flagella production.

203

#### 204 Glycogen utilization confers a growth advantage in dynamic nutrient environments

205 Given the importance of glycogen during physiological transitions, we sought to establish the  
206 growth advantage conferred by glycogen utilization under controlled, dynamically changing  
207 conditions. By coupling microfluidics and time-lapse imaging, we monitored the volumetric  
208 growth of individual *E. coli* cells under fluctuating and steady nutrient supply. The fluctuating  
209 environment consisted of 30 s long nutrient pulses followed by 5 min of carbon starvation,  
210 whereas in the steady environment the carbon source was continuously replenished ([Figure](#)  
211 [5A](#)). In both environments, precise control over the nutrient signal was maintained by flowing  
212 medium over surface-attached cells and switching between two media when generating a  
213 pulse (Nguyen, Fernandez, et al., 2019; Sekar et al., 2018). In these environments, we  
214 competed the YFP-labeled wild-type and the CFP-labeled *glgP* mutant and monitored their  
215 growth through image analysis.

216

217 In fluctuating environments, cells capable of consuming glycogen had an apparent growth  
218 advantage over those that could not. From time-lapse images, YFP-labeled wild-type cells  
219 visibly increased in cell mass and often divided, while the CFP-labeled *glgP* mutant hardly  
220 grew in size ([Figure 5B](#)). We then quantified single-cell growth rate as the rate at which cell  
221 volume exponentially doubles, as assessed from image frames captured 3 min apart. In  
222 fluctuating environments, these quantifications yielded maximum specific growth rates of  
223  $0.28 \pm 0.04 \text{ h}^{-1}$  and  $0.13 \pm 0.03 \text{ h}^{-1}$  for wild-type and mutant strains, respectively, whereas in  
224 steady environments, the maximum specific growth rates of the two strains were  
225 indistinguishable ([Figure 5C](#)). To summarize, the ability to utilize glycogen enhances growth

226 in fluctuating environments, thereby substantiating a key role for glycogen as an immediately  
227 available resource across changing environments.

228

### 229 Glycogen utilization enable improved nutrient uptake capability

230 So far, we have established that glycogen utilization confers a growth advantage in dynamic  
231 environments by providing energy and carbon in nutrient poor transition phases. It is not clear  
232 which cellular functions are supplied by the freed carbon from liquidated glycogen beyond  
233 biofilm faculties. Nevertheless, we hypothesized that the at least some of the freed carbon  
234 would lead to better uptake ability, a paramount survival attribute in scant environments. To  
235 measure the cellular ability for nutrient uptake, we used real-time metabolomics to monitor  
236 glucose uptake while switching the cells between starvation and pulses of glucose (Sekar et  
237 al., 2018). As in the antecedent study, we observed rapid assimilation of glucose, as indicated  
238 by the detected levels of the ion corresponding to glucose (Figure 6A). Each pulse showed an  
239 instantaneous increase of glucose concentration followed by depletion caused by bacterial  
240 consumption. Fitting a Michaelis-Menten model to the glucose consumption, where the  
241 uptake rate equates to the  $V_{\max}$  of the fit (Figure 6B), revealed a much lower maximum  
242 capacity for glucose uptake in the *glgP* mutant compared to the wild-type (Figure 6C).

243

244 To test whether the difference in uptake capacity stemmed primarily from the carbon release  
245 in glycogen, we simulated the carbon release by providing a short dose of carbon by feeding  
246 glucose at 8 mmol/g/h for 5 min (Figure 6A), after the first set of limiting glucose pulses.  
247 Consistent with our hypothesis, the glucose uptake capacity remained high for the wild-type  
248 but improved significantly for the *glgP* mutant. Thus, the uptake capability does appear to  
249 originate from access to a nutrient source during starvation, whether its internal glycogen or  
250 additional carbon input. This carbon supply may fuel the synthesis of uptake related proteins,

251 which are transcriptionally controlled by starvation related effectors (e.g. Crp) (You et al.,  
252 2013). The carbon supply may also prime the cells metabolically for carbon uptake, for  
253 example through high phosphoenolpyruvate (PEP) abundance. PEP is the substrate to  
254 phosphorylate incoming glucose through the phosphotransferase system, the primary means  
255 of rapid glucose uptake. While we did not measure PEP directly, we noticed differences in the  
256 energy charges, AMP and ADP, between wild-type and the glycogen mutant during starvation  
257 (Figure S4). Specifically, AMP and ADP were approximately 2.5 and 1.4 times more  
258 abundant in the mutant compared to wild-type, respectively. Difference in charge are often  
259 associated with changes in PEP abundance due to the dependence of PEP-associated  
260 carboxylases and kinases on the energy charges (Sauer & Eikmanns, 2005). In summary,  
261 glycogen release enables cells to perform more rapid uptake: an important capability when  
262 environments change often and nutrients are available only fleetingly.

263

## 264 Discussion

265 From our findings, we propose a role for bacterial glycogen in dynamic environments. We  
266 found that glycogen is used to an appreciable magnitude in a short span of time (~80% within  
267 10 minutes), as glucose availability goes to zero. This demonstrates that glycogen is not  
268 merely a long-term energy storage that supplies microbial maintenance. Instead, glycogen is  
269 used within minutes for immediate physiological changes such as resumption of growth,  
270 induction of the attachment phase of biofilm formation, and to enable scavenging of nutrients.  
271 Furthermore, glycogen utilizing cells exhibited faster growth rates in dynamic environments,  
272 such as single nutrient shifts or repeated nutrient fluctuations, than glycogen-deficient cells.  
273 Altogether, our data reveals glycogen as a crucial internal resource, consumed within minutes  
274 of carbon starvation and synthesized within minutes of carbon re-availability, to aid in the  
275 physiological transitions that accompany environmental change.

276

277 Environmental change imposes physiological challenges to bacteria. For example, in nutrient-  
278 rich conditions, cells are not limited by their ability to scavenge nutrients. However, in  
279 starvation, the opposite is needed — cells must take up diverse nutrients much more  
280 efficiently (Towbin et al., 2017; You et al., 2013). The two scenarios result in a dilemma: the  
281 cell has a contrarian objective after switching between carbon rich and poor conditions.  
282 Meeting the new objective requires an appreciable change either in the abundance of key  
283 proteins for uptake or to reconfigure the cells metabolically (*e.g.*, elevated concentrations of  
284 PEP). Our data depict glycogen as a solution: a fast, flexible store of nutrients. While inability  
285 to use glycogen does not prevent cells from making physiological transitions, the ability to  
286 use glycogen seems to quicken the rate at which transitions occur. Thus, we show that  
287 glycogen is a facile resource for the cell to more quickly adjust its physiology to compete  
288 more effectively in starvation and nutrient poor conditions.

289

## 290 Methods

### 291 Strains and plasmids

292 *E. coli* BW 25113 from the Keio collection (Baba et al., 2006) was used as the wild-type  
293 (WT) strain for all experiments. Kanamycin markers were excised from the Keio knockout  
294 strains *glgP*, *glgA*, *glgB*, and *glgC* using pCP20 and verified using PCR (Datsenko & Wanner,  
295 2000). All strains are listed in **Table S1** and plasmids are listed in **Table S2**. Strains and  
296 plasmids are available from authors on request.

297

### 298 Cultivation, media, and real-time metabolomics profiling

299 Glucose media and culture preparation was followed as described in a previous study (Sekar  
300 et al., 2018). On the day before experiments, an inoculum of cells was prepared in sterile  
301 Luria-Bertani (LB) broth (10 g/L NaCl, 10 g/L bacto-tryptone, and 5 g/L yeast extract) in the  
302 morning and cultivated at 37°C with 225 RPM shaking until noon. At noon, cells were 1:50  
303 diluted into M9 minimal medium + 0.4% glucose. In the evening, shake flasks with 35 mL of  
304 M9 medium + 0.4% glucose were prepared with 1:100 dilution from the M9 inoculum and  
305 cultivated at 30°C with 225 RPM shaking until the next morning. On the morning of the  
306 experiment, cells were typically OD 0.1 and then cultivated at 37°C with 225 RPM shaking  
307 until they reached OD 0.8, at which point the experiments were commenced. The M9 minimal  
308 medium consisted of the following components (per liter): 7.52 g Na<sub>2</sub>HPO<sub>4</sub> · 2 H<sub>2</sub>O, 5 g  
309 KH<sub>2</sub>PO<sub>4</sub>, 1.5 g (NH<sub>4</sub>)<sub>2</sub>SO<sub>4</sub>, 0.5 g NaCl. The following components were sterilized separately  
310 and then added (per liter of final medium): 1 mL 0.1 M CaCl<sub>2</sub>, 1 mL 1 M MgSO<sub>4</sub>, 0.6 mL 0.1  
311 M FeCl<sub>3</sub>, 2 mL 1.4 mM thiamine-HCL, and 10 mL trace salt solution. The trace salt solution  
312 contained (per liter) 180 mg ZnSO<sub>4</sub> · 7 H<sub>2</sub>O, 120 mg CuCl<sub>2</sub> · 2 H<sub>2</sub>O, 120 mg MnSO<sub>4</sub> · H<sub>2</sub>O,  
313 180 mg CoCl<sub>2</sub> · 6 H<sub>2</sub>O. The real-time metabolomics profiling is fully described in (Link et al.,  
314 2015), but briefly: Cells were cultivated in a Schott bottle submerged in a water bath

315 controlled at 37°C. Mixing and aeration were provided by a magnetic stirrer. A peristaltic  
316 pump circulated the culture through a six-port valve. On measurement, the valve  
317 configuration diverted roughly 2 µL of culture into a continuous flow of negative ionization  
318 buffer (60:40 vol/vol isopropanol:water with 1 mM ammonium fluoride, pH 9.0). The  
319 ionization buffer, now mixed with the live cells, was introduced for ionization in an  
320 electrospray chamber, and ions' abundances were measured semi-quantitatively using a  
321 Quantitative Time of Flight mass spectrometry detector (Agilent 6550). Measurement (mixing  
322 of culture into the buffer) occurred every 15 seconds, thereby generating a time profile of the  
323 intracellular metabolic concentration. The annotation of ions is described in (Fuhrer, Heer,  
324 Begemann, & Zamboni, 2011).

325

### 326 Real-metabolomics profiling of cells with depleting glucose

327 Cells were grown to mid-log phase where the optical density (OD) at 600 nm was measured  
328 to 0.8. At this point, 32.5 mL of the cells were collected on filter paper using fast filtration  
329 technique (Rabinowitz & Kimball, 2007) and rapidly resuspended into 25 mL of pre-warmed  
330 1:8 diluted M9 medium (37 °C) with 0.32 g/L glucose as the sole carbon source within a  
331 Schott bottle. Immediately after resuspension, the real-time metabolomics profile of the cells  
332 was measured for 1 h.

333

### 334 Lag phase experiments

335

336 To calculate the lag time of the glucose to acetate switch, cells were grown over night in M9  
337 medium with glucose as carbon source at 37°C. The next day, cells were freshly inoculated in  
338 M9 medium with glucose and grown until OD 0.4. The cells were transferred in M9 medium  
339 with acetate either directly or with an intermediate starvation period of 30 min in carbon free  
340 media. For the transfer, the collected cells were rapidly filtered, rinsed, and inoculated to 500

341 mL Erlenmeyer flasks filled with 35 mL of acetate medium. To minimize the stress for the  
342 cells, all equipment and solutions were prewarmed to 37°C and the transfer was performed  
343 within less than two minutes. Cell growth was determined by measuring the OD<sub>600</sub> by  
344 spectrophotometry at 0, 15, 45, 90, 120 min and then every hour up to 420 min after  
345 inoculation. The maximal growth rate was calculated using time-points after 240 min and lag  
346 time was calculated as previously described (Enjalbert, Cocaign-Bousquet, Portais, & Letisse,  
347 2015).

348

## 349 Biofilm

350

351 Wild-type,  $\Delta glgP$ ,  $\Delta glgA$  cells were grown over night at 37°C in Luria Broth (LB) until the  
352 cells entered stationary phase. Cells were transferred to a non-shaking environment at room  
353 temperature to induce biofilm formation. OD<sub>600</sub> of the supernatant was measured every ~30  
354 min.

## 355 Glycogen content experiments

356

357 For the depletion experiment, wild-type cells were grown in M9 media and glucose until OD  
358 0.5-0.8. Cells were rapidly transferred into M9 media without carbon source to initiate  
359 starvation. Samples were taken before starvation and 10 min, 30 min and 50 min after  
360 starvation. For sampling, 1 mL were taken from the culture and kept on ice. To process the  
361 samples, they were centrifuged in a cooled centrifuge at maximum speed for 5 minutes. After  
362 centrifugation, 100  $\mu$ l of BPER were added and the samples were gently shaken for 10  
363 minutes. The samples were again centrifuged for 5 minutes at maximum speed in a cooled  
364 centrifuge and the supernatant was transferred to a fresh tube and stored at -20 degrees until  
365 further processing. For the assay, 25  $\mu$ l of the supernatant were hydrolyzed and processed as  
366 described in the MAK016 assay kit instructions for colorimetric assays (Sigma-Aldrich).

367

368 For the replenishment experiment, wild-type cells were grown in M9 media and glucose until  
369 OD 0.5-0.8. After a starvation period of 30 min in M9 without carbon source, fructose  
370 (200g/L) and thiamine-HCl were added (alternative carbon source to avoid convolution with  
371 the assay). The samples were taken before the addition of fructose and 2 min, 5 min and 30  
372 min after the addition and processed as described above. The glycogen content was measured  
373 with a fluorometric method as described in the MAK016 assay kit instructions (Sigma-  
374 Aldrich).

### 375 [Microfluidics setup](#)

376

377 The custom method of delivering controlled fluctuating nutrient environments is described in  
378 previous work (Nguyen, Fernandez, et al., 2019). In brief, microfluidic channels with a depth  
379 of 60  $\mu\text{m}$  were cast in polydimethylsiloxane (PDMS). Each PDMS (Sylgard 184; Dow  
380 Corning) device was bonded to a glass slide by plasma treating each interacting surface for at  
381 least 1 min, and the assembled chip then incubated for at least 2 h at 80°C. The morning of  
382 each experiment, bonded channels were cooled to room temperature and then treated with a  
383 1:10 dilution of poly-L-lysine (Sigma catalog no. P8920) in Milli-Q water. This treatment  
384 enhanced cell attachment but did not affect growth rate. Wild-type YFP cells and mutant CFP  
385 cells were grown over night in M9 medium with glucose and ampicillin. The cultures were  
386 then inoculated in fresh M9 medium with glucose and ampicillin. After growing until OD 0.5  
387 – 1.0, the cells were filtered and transferred to a 1:8 diluted M9 medium without glucose  
388 (starvation medium) to a final OD of 0.2. Afterwards, the cells were inoculated into the  
389 microchannel. Connecting all inputs and outputs to the microchannel took about 10–15 min,  
390 allowing ample time for cells to settle and attach to the glass surface within each  
391 microchannel before flow was established. By the onset of the fluctuating nutrient signal, cells  
392 were without carbon for at least 30 min. The fluctuating signal delivered 5 min periods of



393 carbon free MOPS medium (Teknova) separated by 30 s periods of 2% LB medium (100%  
394 LB diluted in MOPS medium). The same 2% LB medium was steadily delivered to the non-  
395 fluctuating control environment.

## 396 Image acquisition and analysis

397

398 Bacterial growth within the microfluidic channels was imaged using phase contract  
399 microscopy with a Nikon Eclipse Ti microscope, equipped with an Andor Zyla sCMOS  
400 camera (6.5  $\mu\text{m}$  per pixel) at 60x magnification (40x objective with 1.5x amplification), for a  
401 final image resolution of 0.1083  $\mu\text{m}$  per pixel. Each position was repeatedly imaged every 3  
402 min. Image series were processed using a custom MATLAB particle tracking pipeline, which  
403 identified individual particles based on pixel intensity and measured particle parameters, such  
404 as width and length. These size parameters were used to (1) filter particles that were  
405 associated with multiple cells or cells in close proximity to another and (2) approximate the  
406 volume of each single cell as a cylinder with hemispherical caps. The approximated volumes  
407 were then used to compute instantaneous single-cell growth rates in terms of volume  
408 doublings per hour. Using  $V(t+\Delta t) = V(t) \cdot 2^{\mu\Delta t}$ , we calculated  $\mu$  between each pair of time  
409 points, associating the resulting  $\mu$  with the latter of the two time points.

410

## 411 Data and Code Availability

412 All data and code used for figure generation are available in **Supplementary Data** or at  
413 <https://github.com/karsekar/glycogen-starvation>.

414 **Figures**

415 **Figure 1.** Cells show secondary, glycogen-related metabolic activity upon carbon starvation.

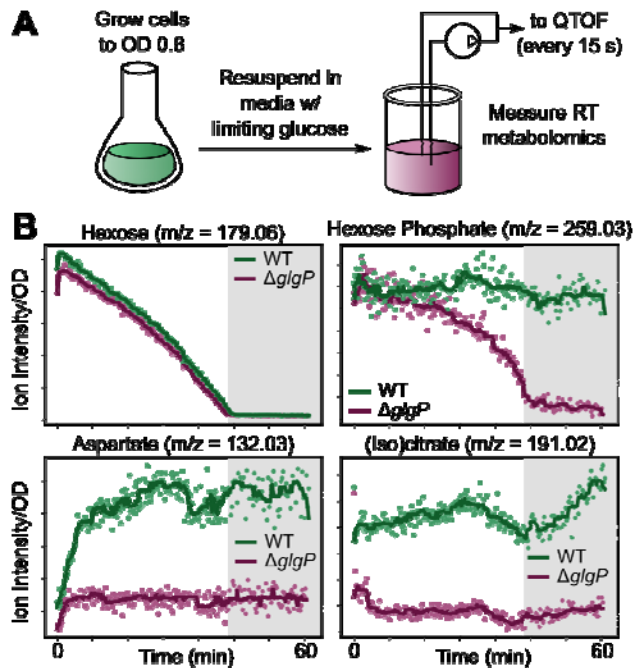

416

417 (A) Experimental setup for measuring metabolic profile of cells depleting carbon. Growing  
418 cells were switched to medium with limiting glucose (0.32 g/L), then real-time metabolomics  
419 (Link et al., 2015) was measured for a total of 1 h. For real-time metabolomics measurement,  
420 a pump circulated culture and injected 2  $\mu$ L of culture directly into a quantitative time of  
421 flight mass spectrometer every 15 s. (B) Glycogen mutant cells observe different metabolic  
422 activity on transition to starvation. Traces of exemplary ions are shown that correspond to  
423 hexose, hexose phosphate, aspartate, and (iso)citrate for two strains, WT (wild-type, green)  
424 and a *glgP* mutant (purple). Dots indicate ion intensity measurement normalized to initial OD.  
425 Gray area indicates the time period after glucose depletion. Solid lines are a moving average  
426 filter of the measured ion intensity.

427

428

429 **Figure 2.** Intracellular glycogen depletes rapidly after carbon downshift and accumulates

430 rapidly on carbon availability.

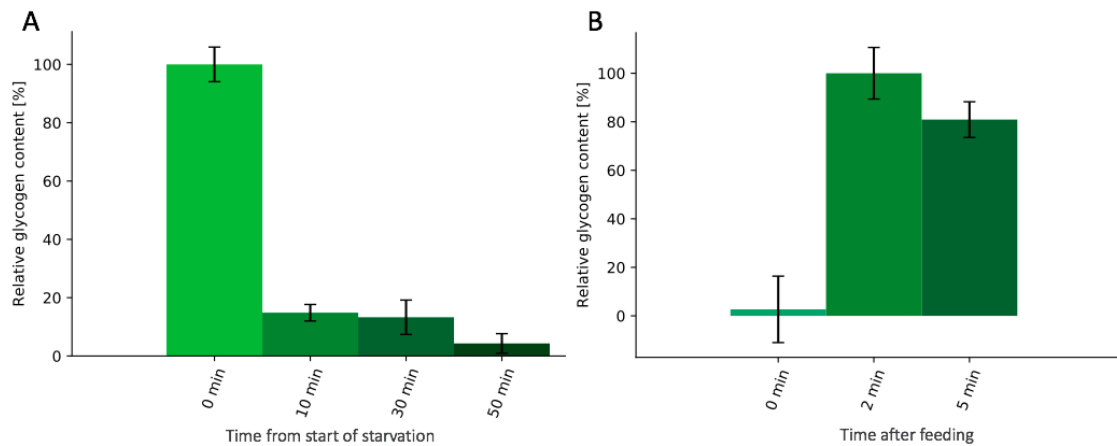

431

432 **(A)** Glycogen depletion during starvation. Wild-type cells were grown to mid-log phase (OD  
433 0.8) and resuspended in medium without carbon. The first sample time point was taken before  
434 resuspension. Error bars indicate the standard error of 6 biological replicates. **(B)** Rapid  
435 glycogen synthesis upon fructose addition to a carbon starving culture. Fructose was added at  
436 time point zero to wild-type *E. coli* harvest from mid-log phase (OD 0.8) after 30 min  
437 starvation in medium without carbon. Error bars indicate the standard error of 3 biological  
438 replicates.

439

440 **Figure 3.** A glycogen-related metabolic response occurs in response to brief, constant glucose  
441 feed.

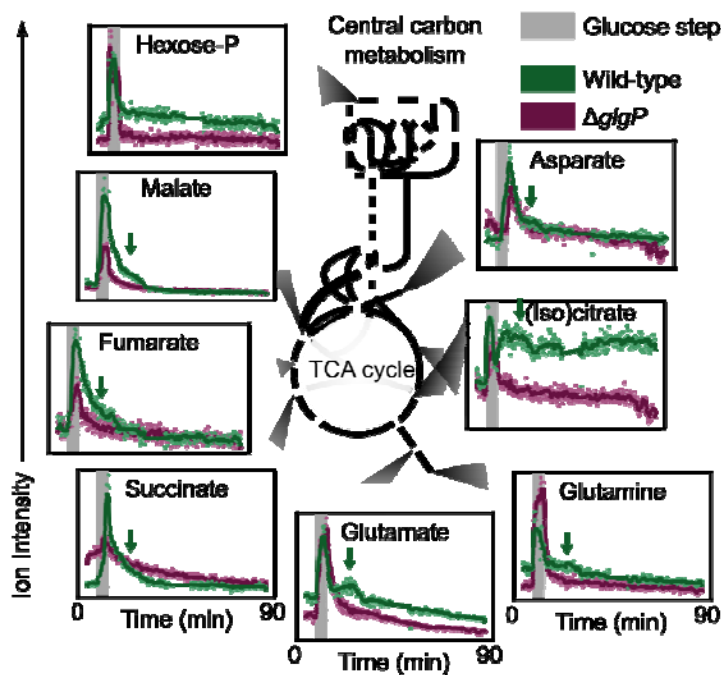

442

443 *E. coli* was grown to OD 0.8-1.2, starved for 30 min without glucose and fed a constant  
444 glucose supply. The glucose was supplied with a pump at a rate of 8 mmol/g/h for two strains,  
445 WT (wild-type, green) and a *glgP* mutant (purple). After 5 min of glucose application, the  
446 glucose feed was ceased. Throughout the feed, real-time metabolomics measurement was  
447 performed, and data is shown for ions corresponding to central carbon metabolites. The green  
448 arrows indicate a metabolic “bounce” where measured ion intensity increases 5-15 minutes  
449 for metabolites malate, fumarate, succinate, glutamate, glutamine, (iso)citrate, and aspartate.  
450 Dots indicate ion intensity measurement normalized to initial OD. Gray area indicates the  
451 time period where glucose was supplied. Solid lines are a moving average filter of the  
452 measured ion intensity.

453

454

455

456 **Figure 4.** Glycogen-related phenotypes in steady state versus changing conditions.

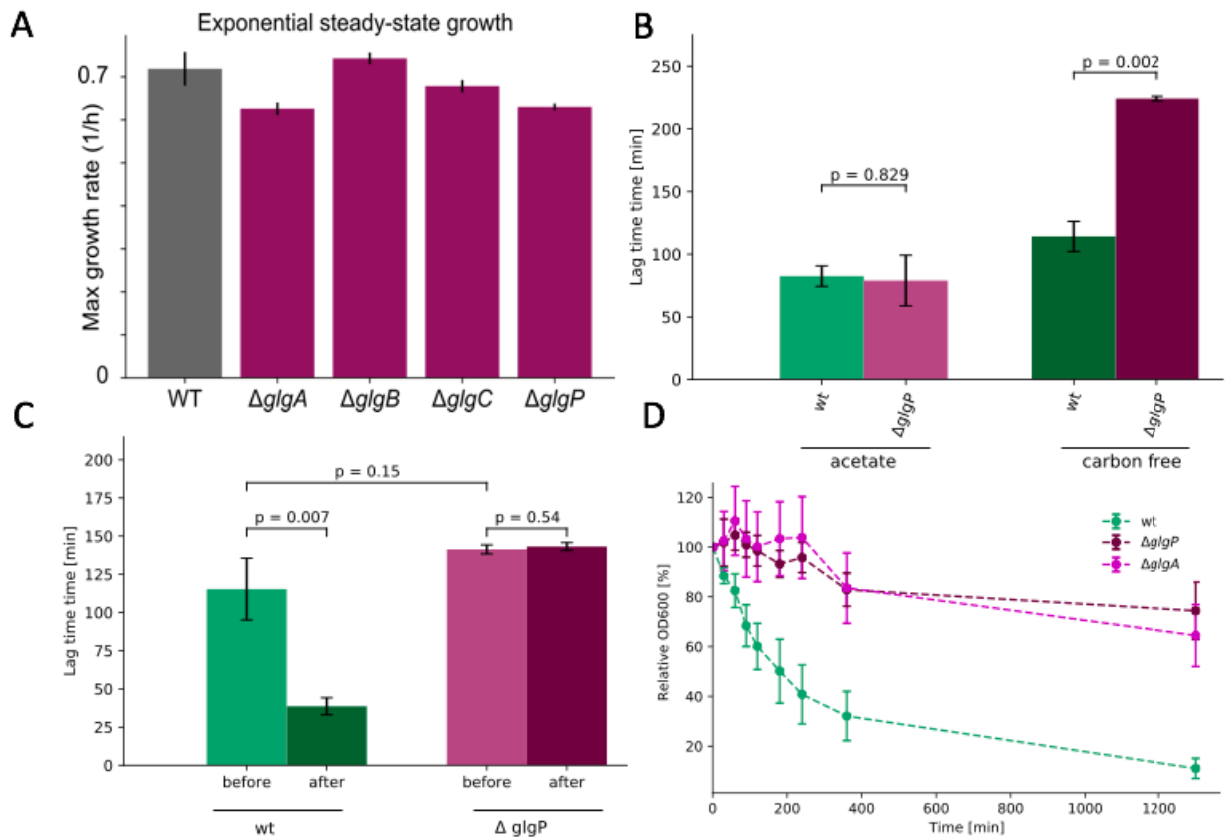

457

458 (A) Glycogen mutants exhibit similar growth rates to wild-type under steady-state growth.

459 (B) The *glgP* glycogen mutant exhibits prolonged lag times when starved between

460 nutrient transitions. Wild-type and *glgP* mutant cells were grown to mid-log phase (OD

461 0.4) in glucose media. Cells were rapidly transferred into acetate medium either directly or

462 with in-between 30 min period of starvation in carbon-free medium. The lag time until

463 growth resumption was measured for all cells. Error bars indicate the standard error of 3

464 biological replicates, and P values were calculated assuming independence with Student's

465 t test. (C) Wild-type and *glgP* mutant cells were grown to mid-log phase (OD 0.4) in

466 glucose media. Cells were rapidly transferred into acetate medium either 60 min before or

467 60 min after glucose depletion in the initial media. The lag time until growth resumption

468 was measured for all cells. (D) Glycogen mutants remained planktonic in stationary

469 phase. Wild-type, *glgP*, and *glgA* mutant cells were grown until stationary phase.

470 Afterwards, cells were cultivated without shaking to initiate biofilm formation. Cell

471 attachment was measured via optical density.

472 **Figure 5.** Glycogen consumption offers a growth advantage in pulsing nutrient  
473 environments

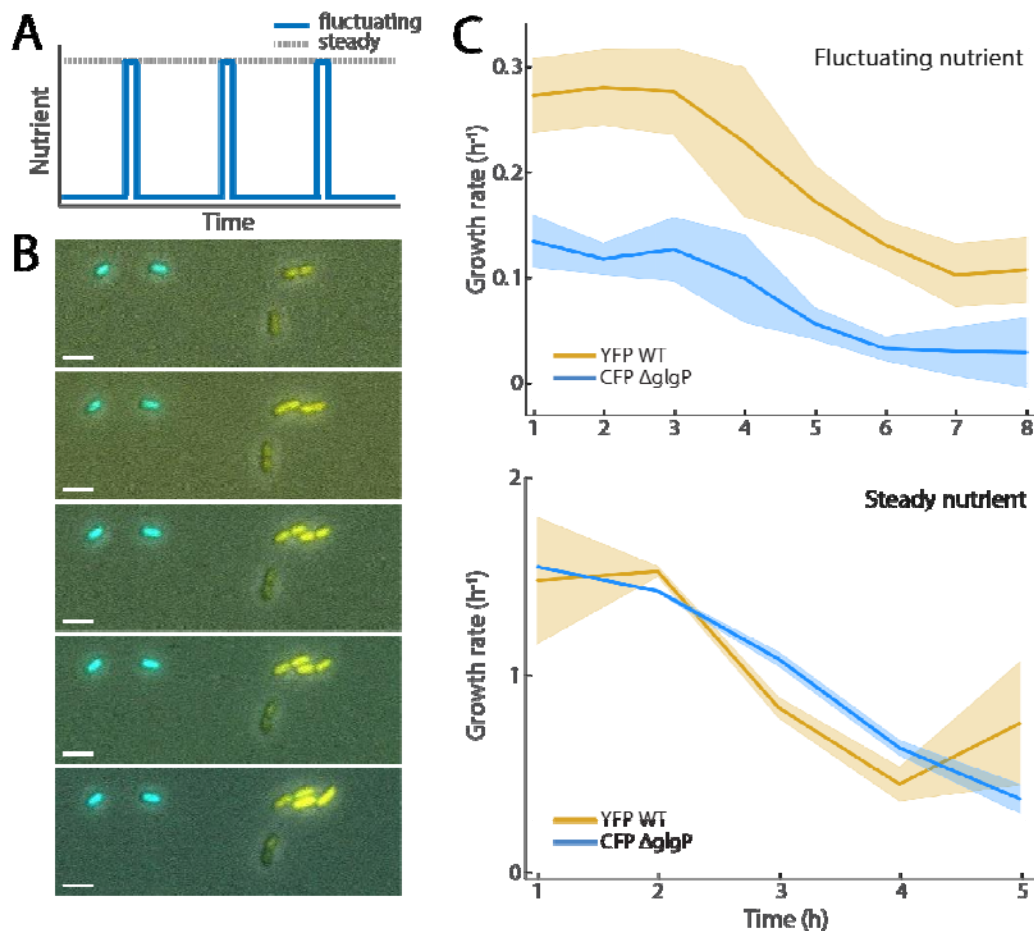

474  
475 (A) Nutrient signals in pulsing and steady environments for microfluidic experiments.  
476 Low phases of the fluctuating signal (blue) deliver zero carbon for 5 min, while the  
477 high phases are 30 second pulses of 2% (v/v) LB solution. The steady nutrient  
478 maintains a constant concentration of 2% LB solution. (B) Montage of composite  
479 images from three channels: phase (grayscale), YFP (yellow) and CFP (cyan). Scale  
480 bar indicates 3  $\mu$ m. (C) Growth rate over time from wild-type and  $\Delta$ glgP populations  
481 within pulsing and steady environments. In both panels, curves represent the mean  
482 growth rate across replicate experiments; error bars represent standard deviation  
483 between replicates (three biological replicates across separate days for pulsing

484 condition; two biological replicates across separate days for steady). Each replicate

485 observed at least 1167 individual *E. coli*.

486



487 **Figure 6.** Glycogen capability enables increased scavenging in starvation.

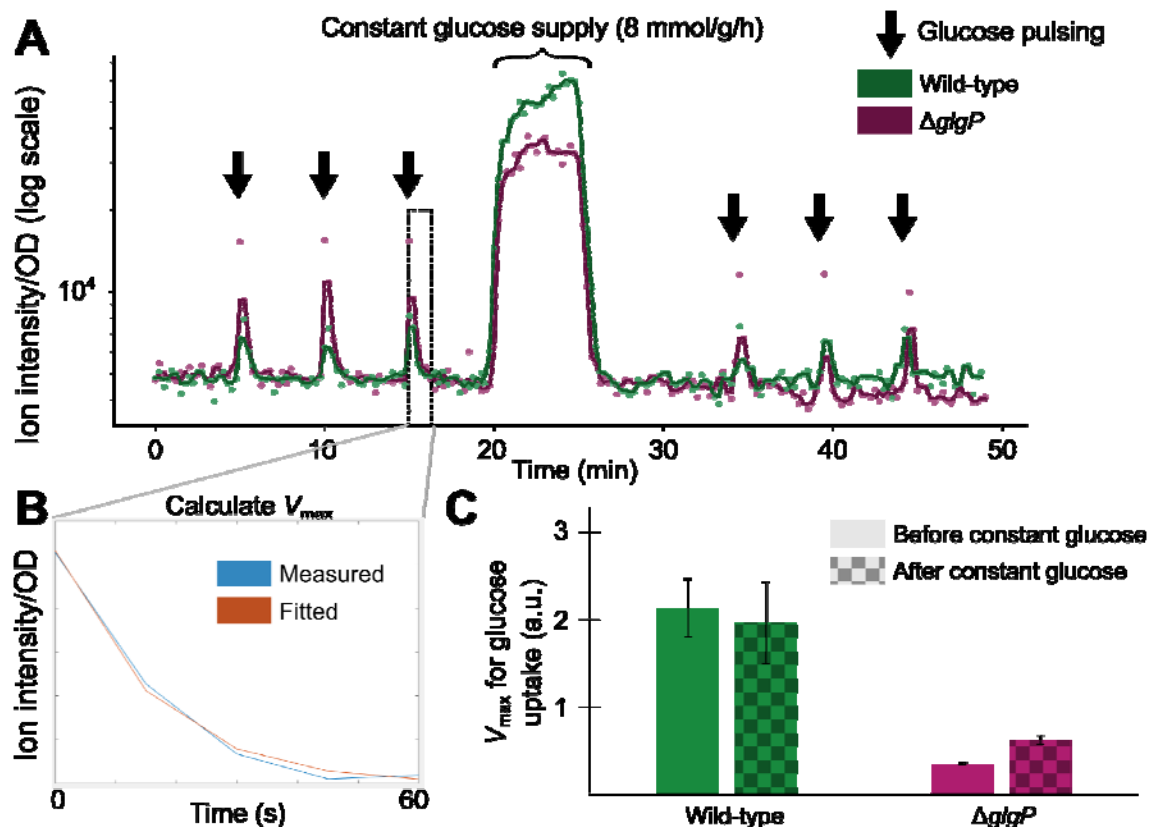

488

489 (A) Real-time metabolomics measurement of the ion corresponding to glucose in starved  
490 cells. Cells were grown to OD 0.8, then switched to media without carbon. Cellular  
491 metabolism was measured with real-time metabolomics as cells were pulse fed glucose every  
492 5 minutes, an integrated feedrate of  $\sim 0.4$  mmol/g DCW/h (raw data available in  
493 **Supplementary Data**). After 20 min, a glucose was constantly supplied at 8 mmol/g/h for 5  
494 minutes. After the constant glucose supply, cells were pulse fed glucose again every 5 min.  
495 (B) The kinetics of the glucose uptake were fitted to a Michaelis-Menten equation in order to  
496 calculate  $V_{max}$  for every pulse. (C) The calculated  $V_{max}$  (scavenging ability) is much lower for  
497 a  $glgP$  mutant compared to wild-type. The scavenging ability increases after the constant  
498 glucose supply for the  $glgP$  mutant; whereas, the WT strain's scavenging ability is not  
499 improved. Error bars indicate the standard error of the glucose uptake rate for the pulses ( $n =$   
500 3). Dots indicate ion intensity measurement normalized to initial OD. Gray area indicates the

501 time period after glucose depletion. Solid lines are a moving average filter of the measured  
502 ion intensity.

503 **Supplementary Information**

504

505 **Table S1. All strains used in this study.**

| <b>Strain</b>       | <b>Genotype</b>                                                                                                              | <b>Description</b>                |
|---------------------|------------------------------------------------------------------------------------------------------------------------------|-----------------------------------|
| Wild-type (WT)      | $\Delta(\text{araD-araB})567\Delta(\text{rhaD-rhaB})568\Delta\text{lacZ4787}(\text{:rrnB-3})\text{hsdR514 rph-1}$            | BW 25113 from (Baba et al., 2006) |
| $\Delta\text{glgP}$ | Same as BW 25113 with $\Delta\text{glgP}$ . Kanamycin marker was excised from corresponding strain from (Baba et al., 2006). | <i>glgP</i> mutant                |
| $\Delta\text{glgA}$ | Same as BW 25113 with $\Delta\text{glgA}$ . Kanamycin marker was excised from corresponding strain from (Baba et al., 2006). | <i>glgA</i> mutant                |
| $\Delta\text{glgB}$ | Same as BW 25113 with $\Delta\text{glgB}$ . Kanamycin marker was excised from corresponding strain from (Baba et al., 2006). | <i>glgB</i> mutant                |
| $\Delta\text{glgC}$ | Same as BW 25113 with $\Delta\text{glgC}$ . Kanamycin marker was excised from corresponding strain from (Baba et al., 2006)  | <i>glgC</i> mutant                |

506

507 **Table S2. All plasmids used in this study.**

| <b>Plasmid</b> | <b>Description</b>                                                                                               | <b>Reference</b>                     |
|----------------|------------------------------------------------------------------------------------------------------------------|--------------------------------------|
| YFP            | Plasmid used to provide constitutive expression of yellow fluorescence protein (pRSET-B YFP AddgeneID: #108856). | (Sarabipour, King, & Hristova, 2014) |
| CFP            | Plasmid used to provide constitutive expression of cyan fluorescein protein (pRSET-B CFP AddgeneID: #108858).    | (Sarabipour et al., 2014)            |

508

509 **Figure S1.** Additional metabolic traces during glucose depletion.

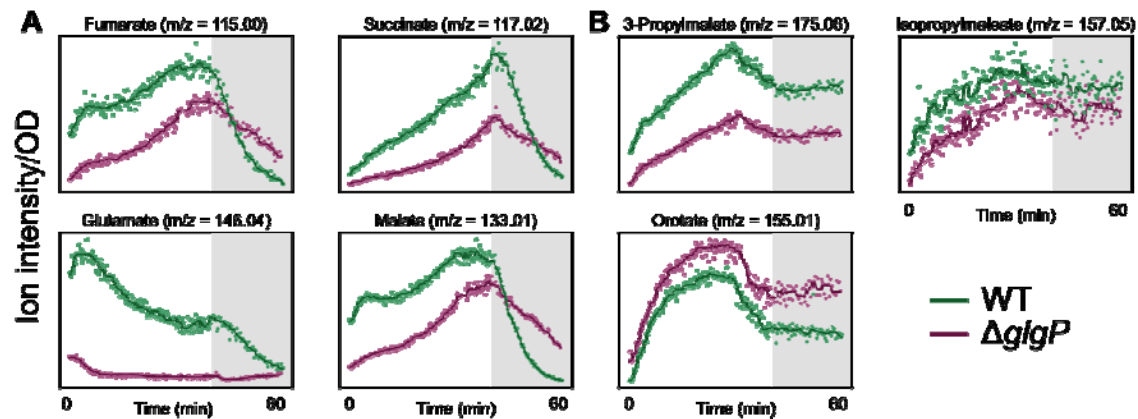

510

511 (A) Various metabolites in the TCA cycle deplete after glucose is depleted out of the media  
512 regardless of glycogen capability. Two strains, WT (Wild-type, green) and a *glgP* mutant  
513 (purple) are shown, as indicated by the color. Dots indicate ion intensity measurement  
514 normalized to initial OD. Gray area indicates the time period after glucose depletion. Solid  
515 lines are a moving average filter of the measured ion intensity. (B) Traces of exemplary ions  
516 that remain constant after glucose depletion for both wild-type and *glgP*.

517

518 **Figure S2. The ion corresponding to glucose rises and falls with the availability of**  
519 **glucose feed.**

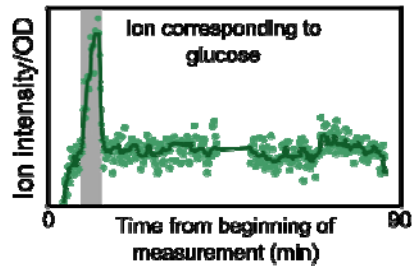

520

521 *E. coli* was grown to OD 0.8-1.2, starved for 30 min without glucose and fed a constant  
522 glucose supply. The glucose was supplied with a pump at a rate of 8 mmol/g/h for two strains,  
523 WT (wild-type, green) and a *glgP* mutant (purple). After 5 min of glucose application, the  
524 glucose feed was ceased. Throughout the feed, real-time metabolomics measurement was  
525 performed, and data is shown for ions corresponding to glucose as in [Figure 3](#). Dots indicate  
526 ion intensity measurement normalized to initial OD. Gray area indicates the time period  
527 where glucose was supplied. Solid lines are a moving average filter of the measured ion  
528 intensity.

529

530

531 Figure S3. Additional ion traces for glucose step experiment.

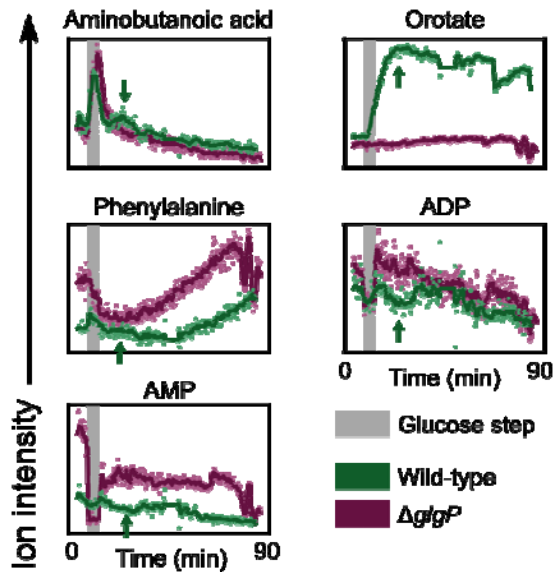

532

533 *E. coli* was grown to OD 0.8-1.2, starved for 30 min without glucose and fed a constant  
534 glucose supply. The glucose was supplied with a pump at a rate of 8 mmol/g/h for two strains,  
535 WT (wild-type, green) and a *glpP* mutant (purple). After 5 min of glucose application, the  
536 glucose feed was ceased. Throughout the feed, real-time metabolomics measurement was  
537 performed, and data is shown for ions corresponding to metabolites (aminobutanoic acid,  
538 orotate, phenylalanine) and energy charges (AMP and ADP) as in Figure 3. Dots indicate ion  
539 intensity measurement normalized to initial OD. Gray area indicates the time period where  
540 glucose was supplied. Solid lines are a moving average filter of the measured ion intensity.

541

542

## 543 Author contributions

544 K.S. conceived the project. All authors designed the experiments. K.S., S.M.L., J.N. and A.G.  
545 developed the methodology, executed the experiments, and analyzed the data. U.S. and R.S.  
546 supervised the work. K.S., S.M.L., and J.N. wrote the manuscript. All authors reviewed and  
547 approved the manuscript.

548

## 549 Acknowledgements

550 We thank the Sauer laboratory members for useful comments and feedback on the  
551 manuscript. We additionally thank T. Conway for discussions, and C. Gao for important  
552 advice on the image analysis.

553

## 554 References

- 555 Baba, T., Ara, T., Hasegawa, M., Takai, Y., Okumura, Y., Baba, M., ... Mori, H. (2006). Construction  
556 of *Escherichia coli* K-12 in-frame, single-gene knockout mutants: The Keio collection.  
557 *Molecular Systems Biology*, 2, 2006.0008. <https://doi.org/10.1038/msb4100050>
- 558 Bergkessel, M., Basta, D. W., & Newman, D. K. (2016). The physiology of growth arrest: Uniting  
559 molecular and environmental microbiology. *Nature Reviews Microbiology*, 14(9), 549–562.  
560 <https://doi.org/10.1038/nrmicro.2016.107>
- 561 Bertrand, R. L. (2019). Lag Phase Is a Dynamic, Organized, Adaptive, and Evolvable Period That  
562 Prepares Bacteria for Cell Division. *Journal of Bacteriology*, 201(7), e00697-18.  
563 <https://doi.org/10.1128/JB.00697-18>

- 564 Bourassa, L., & Camilli, A. (2009). Glycogen contributes to the environmental persistence and  
565 transmission of *Vibrio cholerae*. *Molecular Microbiology*, 72(1), 124–138.  
566 <https://doi.org/10.1111/j.1365-2958.2009.06629.x>
- 567 Datsenko, K. A., & Wanner, B. L. (2000). One-step inactivation of chromosomal genes in *Escherichia*  
568 *coli* K-12 using PCR products. *Proceedings of the National Academy of Sciences of the United*  
569 *States of America*, 97(12), 6640–6645. <https://doi.org/10.1073/pnas.120163297>
- 570 Davidi, D., & Milo, R. (2017). Lessons on enzyme kinetics from quantitative proteomics. *Current*  
571 *Opinion in Biotechnology*, 46, 81–89. <https://doi.org/10.1016/j.copbio.2017.02.007>
- 572 Enjalbert, B., Cocaign-Bousquet, M., Portais, J.-C., & Letisse, F. (2015). Acetate Exposure  
573 Determines the Diauxic Behavior of *Escherichia coli* during the Glucose-Acetate Transition.  
574 *Journal of Bacteriology*, 197(19), 3173–3181. <https://doi.org/10.1128/JB.00128-15>
- 575 Fuhrer, T., Heer, D., Begemann, B., & Zamboni, N. (2011). High-throughput, accurate mass  
576 metabolome profiling of cellular extracts by flow injection-time-of-flight mass spectrometry.  
577 *Analytical Chemistry*, 83(18), 7074–7080. <https://doi.org/10.1021/ac201267k>
- 578 Jones, S. A., Jorgensen, M., Chowdhury, F. Z., Rodgers, R., Hartline, J., Leatham, M. P., ... Conway,  
579 T. (2008). Glycogen and Maltose Utilization by *Escherichia coli* O157:H7 in the Mouse  
580 Intestine. *Infection and Immunity*, 76(6), 2531–2540. <https://doi.org/10.1128/IAI.00096-08>
- 581 Kohanim, Y. K., Levi, D., Jona, G., Towbin, B. D., Bren, A., & Alon, U. (2018). A Bacterial Growth  
582 Law out of Steady State. *Cell Reports*, 23(10), 2891–2900.  
583 <https://doi.org/10.1016/j.celrep.2018.05.007>
- 584 Li, S. H.-J., Li, Z., Park, J. O., King, C. G., Rabinowitz, J. D., Wingreen, N. S., & Gitai, Z. (2018).  
585 *Escherichia coli* translation strategies differ across carbon, nitrogen and phosphorus limitation  
586 conditions. *Nature Microbiology*, 3(8), 939. <https://doi.org/10.1038/s41564-018-0199-2>
- 587 Link, H., Fuhrer, T., Gerosa, L., Zamboni, N., & Sauer, U. (2015). Real-time metabolome profiling of  
588 the metabolic switch between starvation and growth. *Nature Methods*, 12(11), 1091–1097.  
589 <https://doi.org/10.1038/nmeth.3584>



- 590 Mandel, M. J., & Silhavy, T. J. (2005). Starvation for Different Nutrients in Escherichia coli Results in  
591 Differential Modulation of RpoS Levels and Stability. *Journal of Bacteriology*, 187(2), 434–  
592 442. <https://doi.org/10.1128/JB.187.2.434-442.2005>
- 593 Metzl-Raz, E., Kafri, M., Yaakov, G., Soifer, I., Gurvich, Y., & Barkai, N. (2017). Principles of  
594 cellular resource allocation revealed by condition-dependent proteome profiling. *ELife*, 6,  
595 e28034. <https://doi.org/10.7554/eLife.28034>
- 596 Monk, J. M., Koza, A., Campodonico, M. A., Machado, D., Seoane, J. M., Palsson, B. O., ... Feist, A.  
597 M. (2016). Multi-omics Quantification of Species Variation of Escherichia coli Links  
598 Molecular Features with Strain Phenotypes. *Cell Systems*, 3(3), 238-251.e12.  
599 <https://doi.org/10.1016/j.cels.2016.08.013>
- 600 Mori, M., Schink, S., Erickson, D. W., Gerland, U., & Hwa, T. (2017). Quantifying the benefit of a  
601 proteome reserve in fluctuating environments. *Nature Communications*, 8(1), 1225.  
602 <https://doi.org/10.1038/s41467-017-01242-8>
- 603 Morin, M., Ropers, D., Cinquemani, E., Portais, J.-C., Enjalbert, B., & Coccagn-Bousquet, M. (2017).  
604 The Csr System Regulates Escherichia coli Fitness by Controlling Glycogen Accumulation  
605 and Energy Levels. *MBio*, 8(5). <https://doi.org/10.1128/mBio.01628-17>
- 606 Mutlu, A., Trauth, S., Ziesack, M., Nagler, K., Bergeest, J.-P., Rohr, K., ... Bischofs, I. B. (2018).  
607 Phenotypic memory in Bacillus subtilis links dormancy entry and exit by a spore quantity-  
608 quality tradeoff. *Nature Communications*, 9(1), 69. [https://doi.org/10.1038/s41467-017-](https://doi.org/10.1038/s41467-017-02477-1)  
609 02477-1
- 610 Nguyen, J., Fernandez, V., Pontrelli, S., Sauer, U., Ackermann, M., & Stocker, R. (2019). A bacterial  
611 physiology that enhance growth under rapid nutrient fluctuations. *Under Review*.
- 612 O'Brien, E. J., Utrilla, J., & Palsson, B. O. (2016). Quantification and Classification of E. coli  
613 Proteome Utilization and Unused Protein Costs across Environments. *PLoS Computational*  
614 *Biology*, 12(6). <https://doi.org/10.1371/journal.pcbi.1004998>
- 615 Rabinowitz, J. D., & Kimball, E. (2007). Acidic acetonitrile for cellular metabolome extraction from  
616 Escherichia coli. *Analytical Chemistry*, 79(16), 6167–6173. <https://doi.org/10.1021/ac070470c>

- 617 Rahman, M., Hasan, M. R., Oba, T., & Shimizu, K. (2006). Effect of rpoS gene knockout on the  
618 metabolism of Escherichia coli during exponential growth phase and early stationary phase  
619 based on gene expressions, enzyme activities and intracellular metabolite concentrations.  
620 *Biotechnology and Bioengineering*, 94(3), 585–595. <https://doi.org/10.1002/bit.20858>
- 621 Sander, T., Farke, N., Diehl, C., Kuntz, M., Glatter, T., & Link, H. (2019). Allosteric Feedback  
622 Inhibition Enables Robust Amino Acid Biosynthesis in E. coli by Enforcing Enzyme  
623 Overabundance. *Cell Systems*, 8(1), 66-75.e8. <https://doi.org/10.1016/j.cels.2018.12.005>
- 624 Sarabipour, S., King, C., & Hristova, K. (2014). Uninduced high-yield bacterial expression of  
625 fluorescent proteins. *Analytical Biochemistry*, 449, 155–157.  
626 <https://doi.org/10.1016/j.ab.2013.12.027>
- 627 Sauer, U., & Eikmanns, B. J. (2005). The PEP–pyruvate–oxaloacetate node as the switch point for  
628 carbon flux distribution in bacteria. *FEMS Microbiology Reviews*, 29(4), 765–794.  
629 <https://doi.org/10.1016/j.femsre.2004.11.002>
- 630 Sekar, K., Rusconi, R., Sauls, J. T., Fuhrer, T., Noor, E., Nguyen, J., ... Sauer, U. (2018). Synthesis  
631 and degradation of FtsZ quantitatively predict the first cell division in starved bacteria.  
632 *Molecular Systems Biology*, 14(11), e8623. <https://doi.org/10.15252/msb.20188623>
- 633 Seok, Y.-J., Sondej, M., Badawi, P., Lewis, M. S., Briggs, M. C., Jaffe, H., & Peterkofsky, A. (1997).  
634 High Affinity Binding and Allosteric Regulation of Escherichia coli Glycogen Phosphorylase  
635 by the Histidine Phosphocarrier Protein, HPr. *Journal of Biological Chemistry*, 272(42),  
636 26511–26521. <https://doi.org/10.1074/jbc.272.42.26511>
- 637 Shoemaker, W. R., & Lennon, J. T. (2018). Evolution with a seed bank: The population genetic  
638 consequences of microbial dormancy. *Evolutionary Applications*, 11(1), 60–75.  
639 <https://doi.org/10.1111/eva.12557>
- 640 Tavormina, P. L., Kellermann, M. Y., Antony, C. P., Tocheva, E. I., Dalleska, N. F., Jensen, A. J., ...  
641 Orphan, V. J. (2017). Starvation and recovery in the deep-sea methanotroph  
642 Methyloprofundus sedimenti. *Molecular Microbiology*, 103(2), 242–252.  
643 <https://doi.org/10.1111/mmi.13553>

- 644 Thomason, M. K., Fontaine, F., De Lay, N., & Storz, G. (2012). A small RNA that regulates motility  
645 and biofilm formation in response to changes in nutrient availability in *Escherichia coli*.  
646 *Molecular Microbiology*, 84(1), 17–35. <https://doi.org/10.1111/j.1365-2958.2012.07965.x>
- 647 Tian, Z., Fauré, A., Mori, H., & Matsuno, H. (2013). Identification of key regulators in glycogen  
648 utilization in *E. coli* based on the simulations from a hybrid functional Petri net model. *BMC*  
649 *Systems Biology*, 7(Suppl 6), S1. <https://doi.org/10.1186/1752-0509-7-S6-S1>
- 650 Towbin, B. D., Korem, Y., Bren, A., Doron, S., Sorek, R., & Alon, U. (2017). Optimality and sub-  
651 optimality in a bacterial growth law. *Nature Communications*, 8, 14123.  
652 <https://doi.org/10.1038/ncomms14123>
- 653 Wei, B., Shin, S., LaPorte, D., Wolfe, A. J., & Romeo, T. (2000). Global Regulatory Mutations in  
654 *csrA* and *rpoS* Cause Severe Central Carbon Stress in *Escherichia coli* in the Presence of  
655 Acetate. *Journal of Bacteriology*, 182(6), 1632–1640.
- 656 Weiss, N., Obied, K. E. T. E., Kalkman, J., Lammertink, R. G. H., & van Leeuwen, T. G. (2016).  
657 Measurement of biofilm growth and local hydrodynamics using optical coherence  
658 tomography. *Biomedical Optics Express*, 7(9), 3508–3518.  
659 <https://doi.org/10.1364/BOE.7.003508>
- 660 Wilson, W. A., Roach, P. J., Montero, M., Baroja-Fernández, E., Muñoz, F. J., Eydallin, G., ...  
661 Pozueta-Romero, J. (2010). Regulation of glycogen metabolism in yeast and bacteria. *FEMS*  
662 *Microbiology Reviews*, 34(6), 952–985. <https://doi.org/10.1111/j.1574-6976.2010.00220.x>
- 663 Yamamotoya, T., Dose, H., Tian, Z., Fauré, A., Toya, Y., Honma, M., ... Matsuno, H. (2012).  
664 Glycogen is the primary source of glucose during the lag phase of *E. coli* proliferation.  
665 *Biochimica et Biophysica Acta (BBA) - Proteins and Proteomics*, 1824(12), 1442–1448.  
666 <https://doi.org/10.1016/j.bbapap.2012.06.010>
- 667 You, C., Okano, H., Hui, S., Zhang, Z., Kim, M., Gunderson, C. W., ... Hwa, T. (2013). Coordination  
668 of bacterial proteome with metabolism by cyclic AMP signalling. *Nature*, 500(7462), 301–  
669 306. <https://doi.org/10.1038/nature12446>

670 Zhao, R., Song, Y., Dai, Q., Kang, Y., Pan, J., Zhu, L., ... Shen, X. (2017). A starvation-induced  
671 regulator, RovM, acts as a switch for planktonic/biofilm state transition in *Yersinia*  
672 pseudotuberculosis. *Scientific Reports*, 7(1), 639. <https://doi.org/10.1038/s41598-017-00534-9>  
673
